# Supplementary material
Source: publisher site journal article supplement (https://www.dovepress.com/article/408911)
Supplement: Supplementary file 1 [file get_supplementary_file.php]

**Table S1** Clinical characteristics of stroke patients based on the genotypes of rs369149111

| **Characteristics** | ***HTRA1* rs369149111** | | | |
| --- | --- | --- | --- | --- |
| **CC** | **CT** | **TT** | ***p*** |
| ALT (U/L) | 26.13 ± 30.37 | 26.60 ± 42.36 | 17.25 ± 8.42 | 0.856 |
| AST (U/L) | 26.12 ± 23.92 | 25.11 ± 27.65 | 20.50 ± 5.00 | 0.858 |
| MONO (%) | 7.14 ± 1.70 | 7.95 ± 1.70 | - | 0.136 |
| TBA (μmol/L) | 7.98 ± 9.34 | 7.50 ± 5.05 | 5.03 ± 2.13 | 0.885 |
| Cr (μmol/L) | 73.73 ± 25.04 | 70.84 ± 17.24 | 70.47 ± 14.26 | 0.623 |
| UA (μmol/L) | 274.59 ± 93.41 | 260.45 ± 91.76 | 359.75 ± 56.26 | 0.074 |
| TG (mmol/L) | 1.58 ± 1.22 | 1.64 ± 1.51 | 1.01 ± 0.33 | 0.618 |
| CHOL (mmol/L) | 3.95 ± 1.01 | 3.80 ± 0.99 | 3.38 ± 0.48 | 0.28 |
| HDL-C (mmol/L) | 1.13 ± 0.28 | 1.08 ± 0.25 | 1.13 ± 0.20 | 0.253 |
| LDL-C (mmol/L) | 1.97 ± 0.69 | 1.83 ± 0.65 | 1.68 ± 0.65 | 0.181 |

ALT: Alanine transaminase; AST: Aspartate aminotransferase; MONO: Monocytes ratio; TBA: Total bile acid; Cr: Creatinine; UA: Uric Acid; TG: Triglyceride; CHOL: Cholesterol; HDL-C: High density lipid-cholesterol; LDL-C: Low density lipid-cholesterol.
